# Supplementary material for: Feather-like Ag@TiO2nanostructures as plasmonic antenna to enhance optoelectronic performance
Source: Royal Society of Chemistry journal article supplement (doi:10.1039/c4cp05398b), 2014-12-22
Supplement: c4cp05398b1.pdf [file c4cp05398b1.pdf]

Electronic Supplementary information (ESI) for

# Feather - like Ag@TiO<sub>2</sub> Nanowires as Plasmonic Antenna to Enhance Optoelectronic Performance

Yang Wang <sup>a</sup>, Jin Zhai <sup>a\*</sup> and Yanlin Song <sup>ab</sup>

<sup>a</sup> Key Laboratory of Bio-Inspired Smart Interfacial Science and Technology of Ministry of Education, Key Laboratory of Bio-inspired Energy Materials and Devices, School of Chemistry and Environment, Beihang University, Beijing 100191, China.

<sup>b</sup> Institute of Chemistry Chinese Academy of Sciences, 100190, Beijing, (P. R. China).

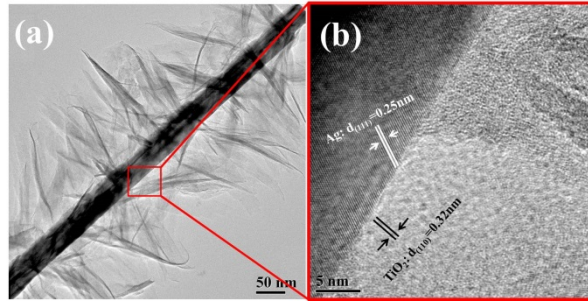

Figure S1. (a) The low-magnification TEM image of Ag@TiO<sub>2</sub>; (b) The HRTEM image of Ag@TiO<sub>2</sub>.

The low-magnification TEM image (Figure S1a) shows that the silver nanowires are encapsulated by feather-like TiO<sub>2</sub>. The HRTEM image (Figure S1b) of the silver core demonstrates that the marked interplanar  $d$  spacing of 0.25 nm correspond to that of the (111) lattice planes of the fcc silver. The HRTEM image of the feather-like TiO<sub>2</sub> (Figure S1b) indicates that the spacing of adjacent fringes of the bristles is 0.32 nm, corresponding to the spacing of the (110) planes of the rutile TiO<sub>2</sub>. The TiO<sub>2</sub> layer coated on the Ag nanowire (excluding the TiO<sub>2</sub> spines) is very thin and difficult to observe. Therefore, the transverse plasma resonance of Ag nanowire will not be affected.

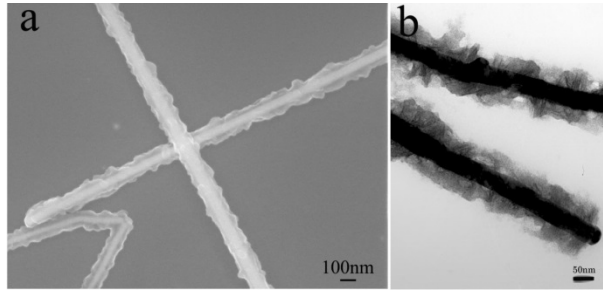

Figure S2. SEM (a) and TEM (b) of the relatively smooth surface Ag@TiO<sub>2</sub> nanowire under 200°C.

---

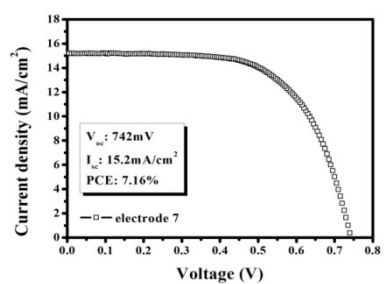

Figure S3. Typical photocurrent-voltage characteristics of electrode 7 with the relatively smooth surface Ag@TiO<sub>2</sub> nanowire (The sensitizer is N719. The cell active area is 0.15 cm<sup>2</sup>, and the light intensity is 100 mW/cm<sup>2</sup>).

---

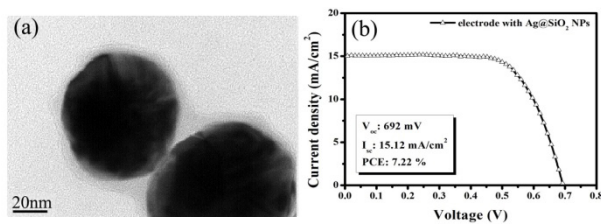

Figure S4. (a) The low-magnification TEM image of Ag@SiO<sub>2</sub>; (b) Typical photocurrent-voltage characteristics of photo anode (electrode 8) with Ag@SiO<sub>2</sub> nanoparticles (The sensitizer is N719. The cell active area is 0.15 cm<sup>2</sup>, and the light intensity is 100 mW/cm<sup>2</sup>).

The Ag@SiO<sub>2</sub> nanoparticles were prepared and introduced them into photo anodes, as shown in Figure S4. Ag NPs were synthesized by the citrate reduction method [1]. The diameter of Ag nanoparticles were ~60nm. To prevent Ag nanoparticle from corrosion in electrolyte, Ag nanoparticles were coated by thin SiO<sub>2</sub>. The outside thickness of SiO<sub>2</sub> shell was 4~5nm, as shown figure S4a. Thus, the electrode with Ag@SiO<sub>2</sub> nanoparticles were measured, as shown figure S4b. The TiO<sub>2</sub> film anchored Ag@SiO<sub>2</sub> showed short circuit current density (15.12 mA/cm<sup>2</sup>), open circuit voltage (692 mV) and energy conversion coefficient (7.22%).

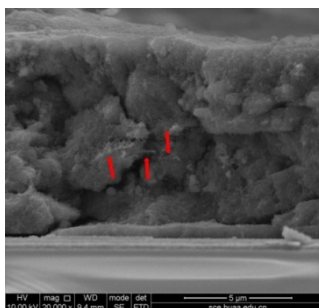

Figure S5. SEM cross section view of the prepared anode with Ag@TiO<sub>2</sub> (indicated by the red arrow).

---

**Reference:**

- [1] P. C. Lee, D. Meisel, *J. Phys. Chem.* 1982, **86**, 3391.
